# Supplementary material for: Emerging investigator series: 3D printed graphene-biopolymer aerogels for water contaminant removal: a proof of concept
Source: Royal Society of Chemistry journal article supplement (doi:10.1039/d0en00953a), 2020-12-10
Supplement: d0en00953a4.pdf [file d0en00953a4.pdf]

1 **Supplementary Information**

2  
3 **3D Printed Graphene-Biopolymer Aerogel for Water Contaminant**  
4 **Removal: A Proof of Concept**

5 Arvid Masud,<sup>1</sup> Chi Zhou,<sup>2</sup> and Nirupam Aich<sup>1,\*</sup>

6 <sup>1</sup>Department of Civil, Structural and Environmental Engineering, University at Buffalo, The

7 State University of New York, Buffalo, NY 14260

8 <sup>2</sup>Department of Industrial and Systems Engineering, University at Buffalo, The State University

9 of New York, Buffalo, NY 14260

10  
11 Submitted to

12 **Environmental Science: Nano**

13  
14 December 20, 2020

15  
16  
17  
18  
19  
20  
21  
22  
23 \*Corresponding Author: Nirupam Aich, Email: nirupama@buffalo.edu

24 **1. Shear Rate Calculation for Rotational Viscometer:**

25 Shear rate ( $s^{-1}$ ) =  $\frac{2\omega R_c^2 R_b^2}{X^2(R_c^2 - R_b^2)}$  .....(Equation 1)<sup>1</sup>

26 Where,  $\omega$  = angular velocity of spindle (rad/s)  $\left[ = \frac{2\pi}{60} \cdot N \right]$ ,

27 N = spindle rotation per minute (rpm)

28  $R_c$  = radius of container (mm)

29  $R_b$  = radius of the spindle

30 X = radius at which shear rate is calculated (mm)

31

32

33

34

35

36

37

38

39

40

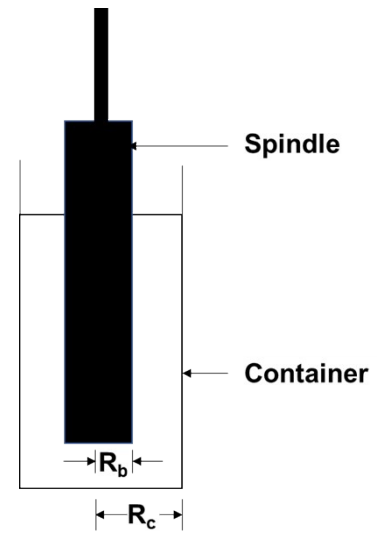

41

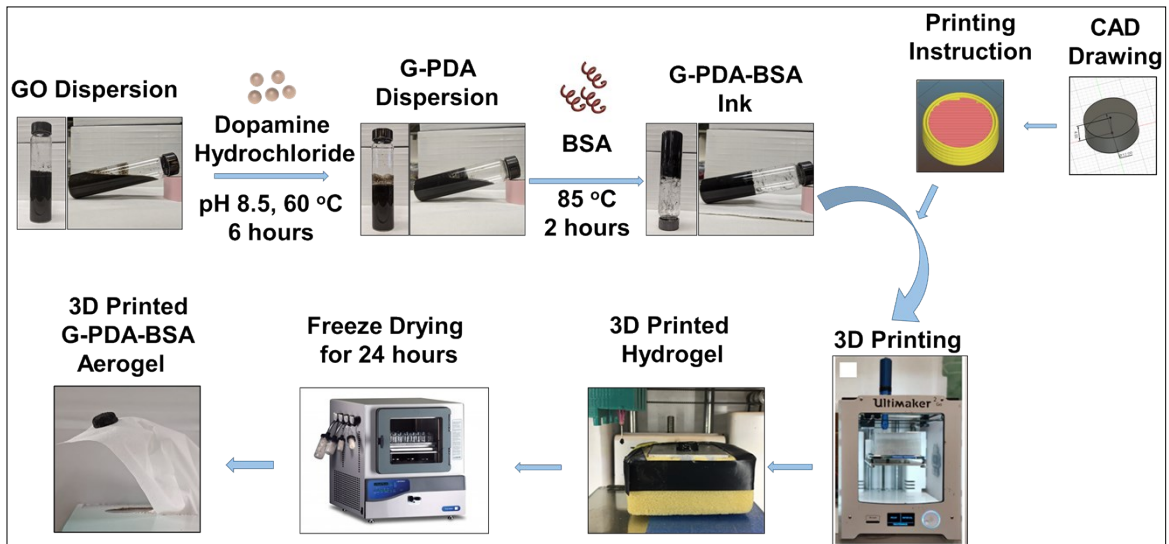

42

43 Figure S1. Summary of the steps involved in the entire 3D printing process of G-PDA-BSA  
44 aerogel.

45

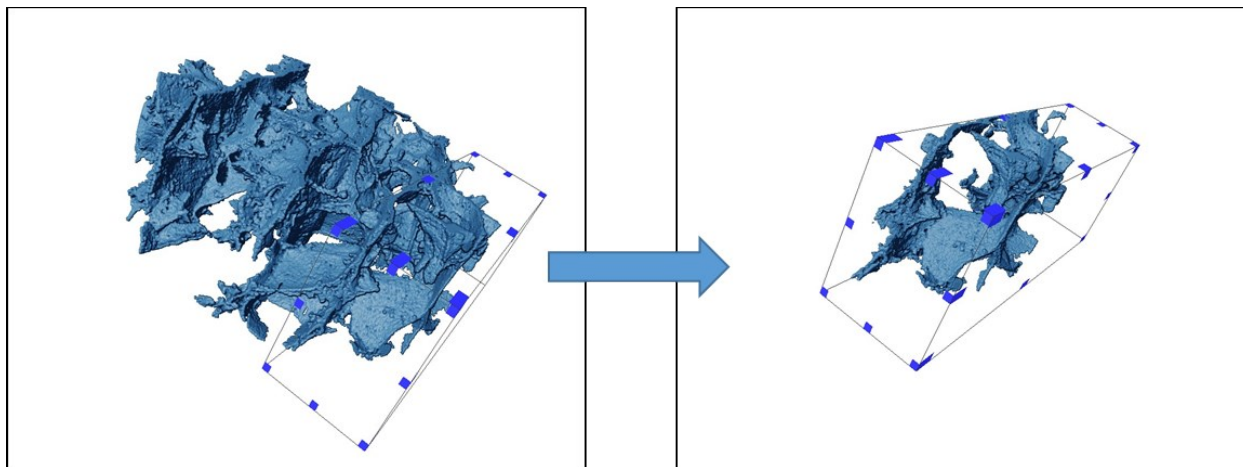

46

47 Figure S2. Segmented section (blue rectangular box) of the G-PDA aerogel.

48

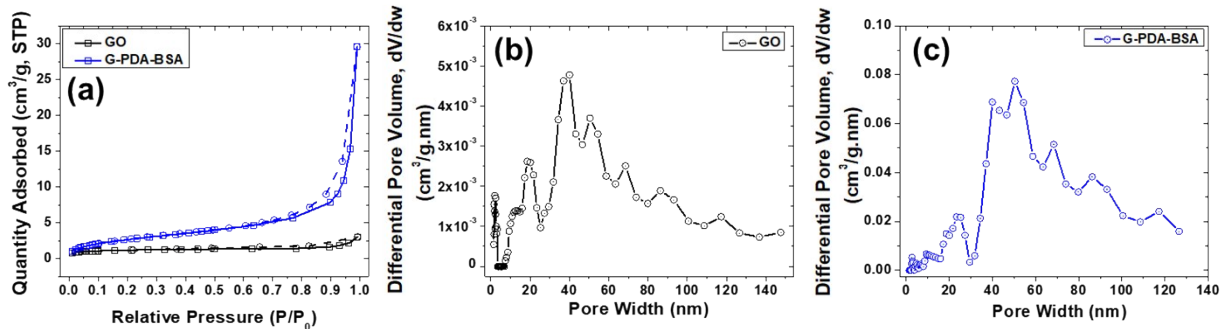

49

50 Figure S3: (a)  $N_2$  adsorption-desorption isotherm for GO and G-PDA-BSA. The solid line  
 51 represents adsorption isotherm whereas the dotted line represents desorption isotherm and  
 52 differential pore volume distribution as function of pore width for (b) GO and (c) G-PDA-BSA  
 53 aerogel

54

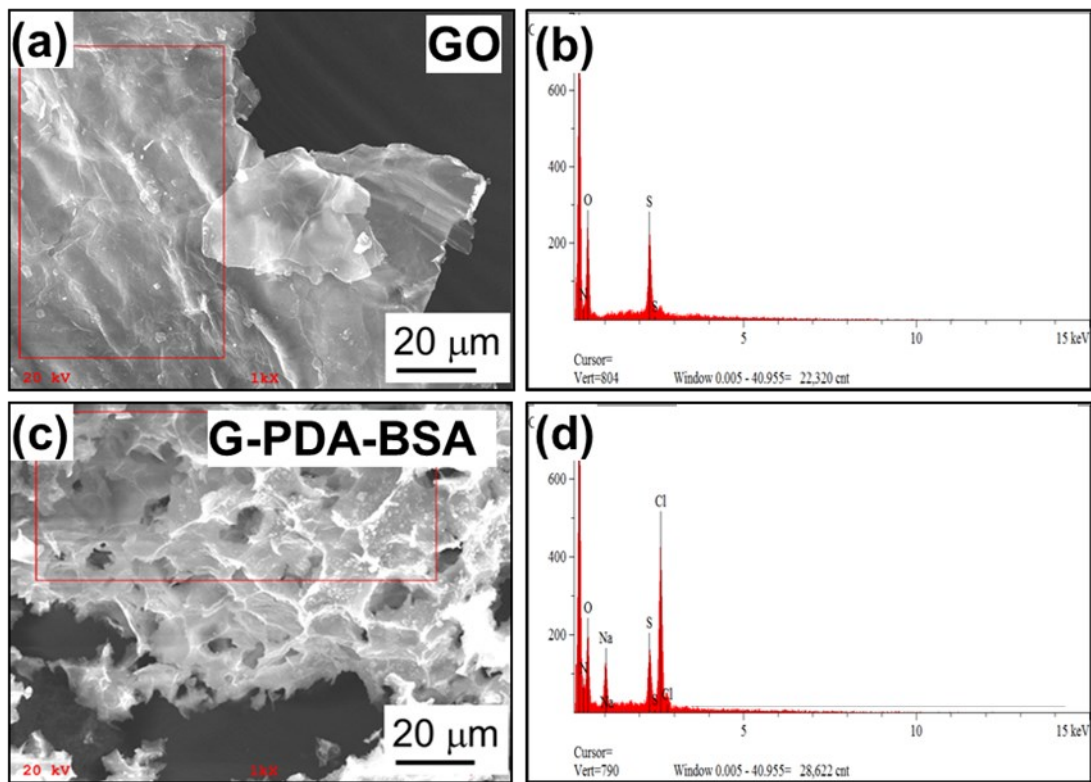

55

56 Figure S4. SEM and EDS spectra of GO (a & b) and G-PDA-BSA aerogel (c & d)

57

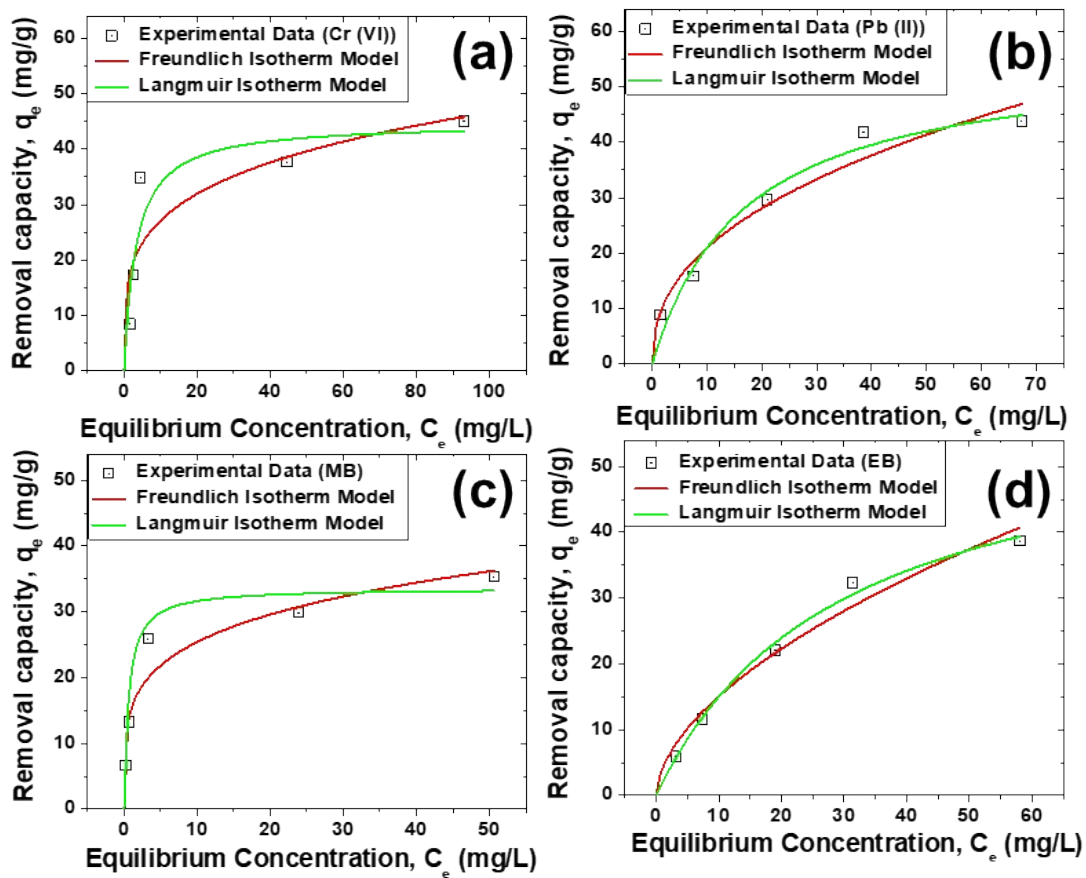

58

59 Figure S5. Equilibrium adsorption isotherms for (a) Cr (VI), (b) Pb (II), (c) MB, and (d) EB with  
 60 fitted isotherm model curves

61

63 Table S1: Apparent viscosity of dispersions at different rotations of Rotational Viscometer

| Rotation (rpm) | Shear rate (s <sup>-1</sup> ) | Apparent viscosity (mPa.s) |       |           |
|----------------|-------------------------------|----------------------------|-------|-----------|
|                |                               | GO                         | G-PDA | G-PDA-BSA |
| 6              | 1.27                          | 32                         | 220   | 98300     |
| 12             | 2.54                          | 28                         | 130   | 49050     |
| 30             | 6.36                          | 21                         | 120   | 19140     |
| 60             | 12.71                         | 17                         | 44    | 9520      |

64

65



66 Table S2: Expressions of isotherm models

| Isotherm Model | Non-linear Expression             | Parameters                                                                                                                                                                                                             |
|----------------|-----------------------------------|------------------------------------------------------------------------------------------------------------------------------------------------------------------------------------------------------------------------|
| Langmuir       | $q_e = \frac{bq_m C_e}{1 + bC_e}$ | <p>b = Langmuir isotherm Constant associated with energy of adsorption (L/mg)</p> <p><math>q_m</math> = Maximum monolayer adsorption capacity (mg/g)</p>                                                               |
| Freundlich     | $q_e = K_f C_e^{\frac{1}{n}}$     | <p><math>K_f</math> = Freundlich isotherm constant associated with adsorption capacity (mg/g)(L/g)<sup><math>\frac{1}{n}</math></sup></p> <p>n = Freundlich isotherm constant associated with adsorption intensity</p> |

67 Where,  $q_e$  = Adsorption capacity at equilibrium (mg/g) (dependent variable)

68  $C_e$  = Equilibrium concentration in adsorbate (mg/L) (independent variable)

69

70 Table S3: Values of Isotherm model parameters for different contaminants

| Contaminant | Langmuir Isotherm Model |                 |                   | Freundlich Isotherm Model             |      |                   |
|-------------|-------------------------|-----------------|-------------------|---------------------------------------|------|-------------------|
|             | b<br>(L/mg)             | $q_m$<br>(mg/g) | Adjusted<br>$R^2$ | $K_f$<br>(mg/g)(L/g)<br>$\frac{1}{n}$ | n    | Adjusted<br>$R^2$ |
| Cr (VI)     | 0.31                    | 44.78           | 0.79              | 15.81                                 | 4.26 | 0.65              |
| Pb (II)     | 0.06                    | 55.96           | 0.95              | 7.97                                  | 2.38 | 0.94              |
| MB          | 1.62                    | 33.60           | 0.91              | 15.37                                 | 4.57 | 0.87              |
| EB          | 0.03                    | 59.41           | 0.99              | 4.10                                  | 1.77 | 0.96              |

71

72 **References**

73 1. Brookfield, E., More solutions to sticky problems. *Brookfield Engineering Labs., Editor*  
 74 **2005.**

75
