# Supplementary material for: Emerging investigator series: 3D printed graphene-biopolymer aerogels for water contaminant removal: a proof of concept
Source: Royal Society of Chemistry journal article supplement (doi:10.1039/d0en00953a), 2020-12-10
Supplement: d0en00953a5.pdf [file d0en00953a5.pdf]

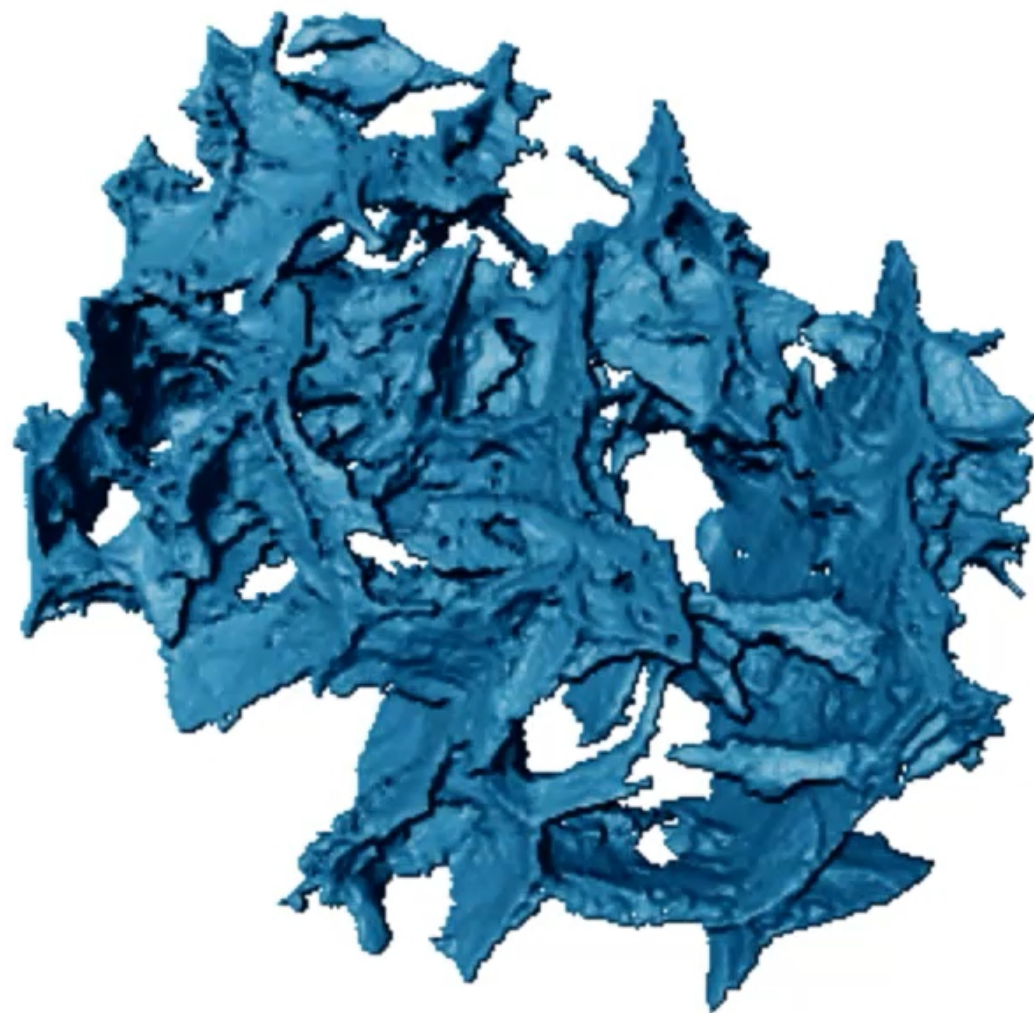

Movie S1. Rotation of Aerogel

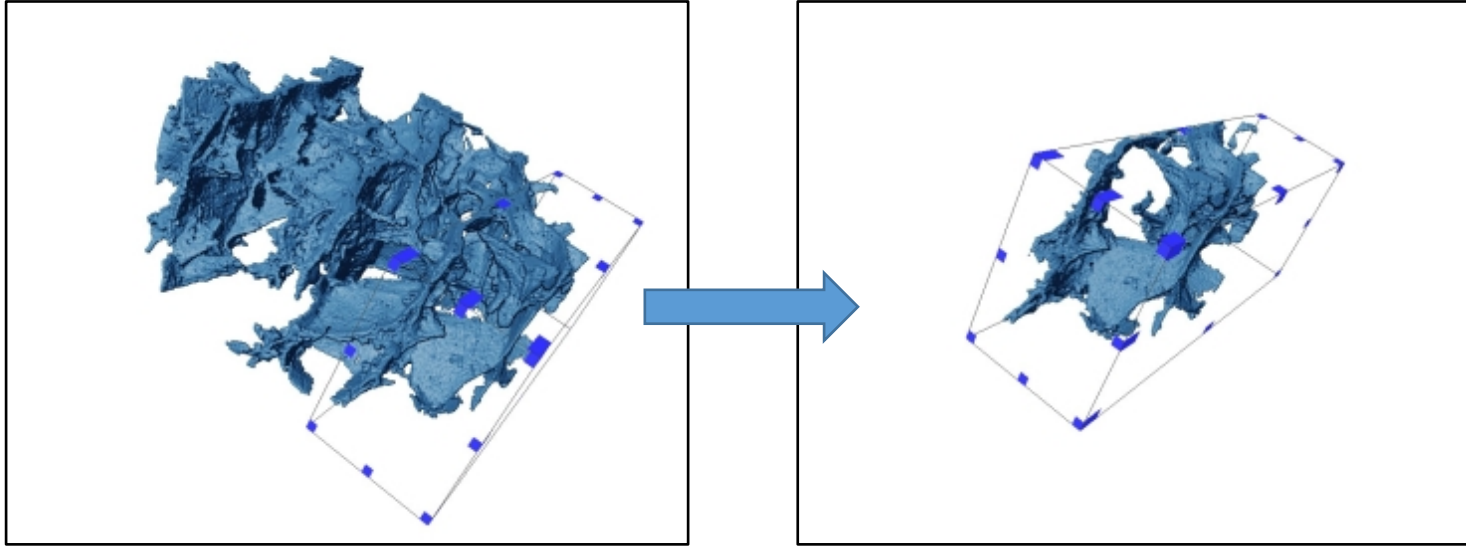

Figure SX. Segment of Aerogel

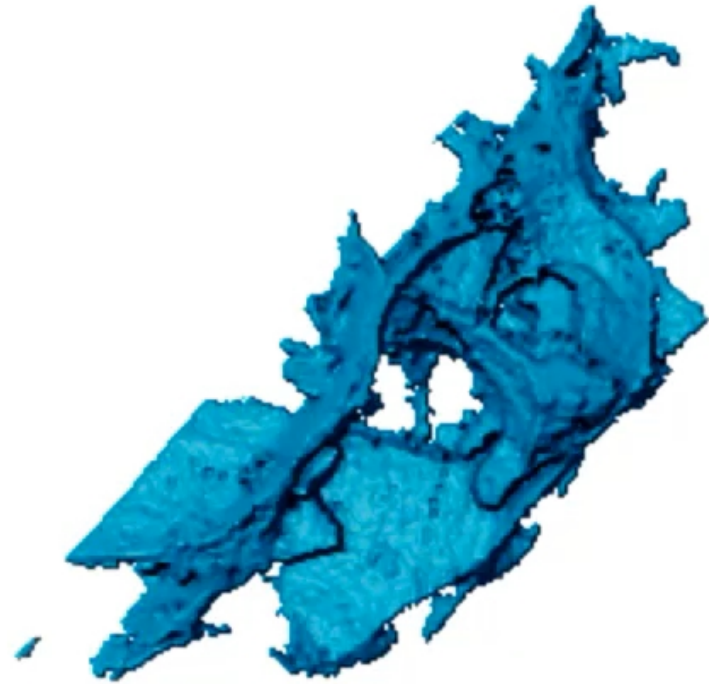

Movie S2. Rotation of Segment of Aerogel

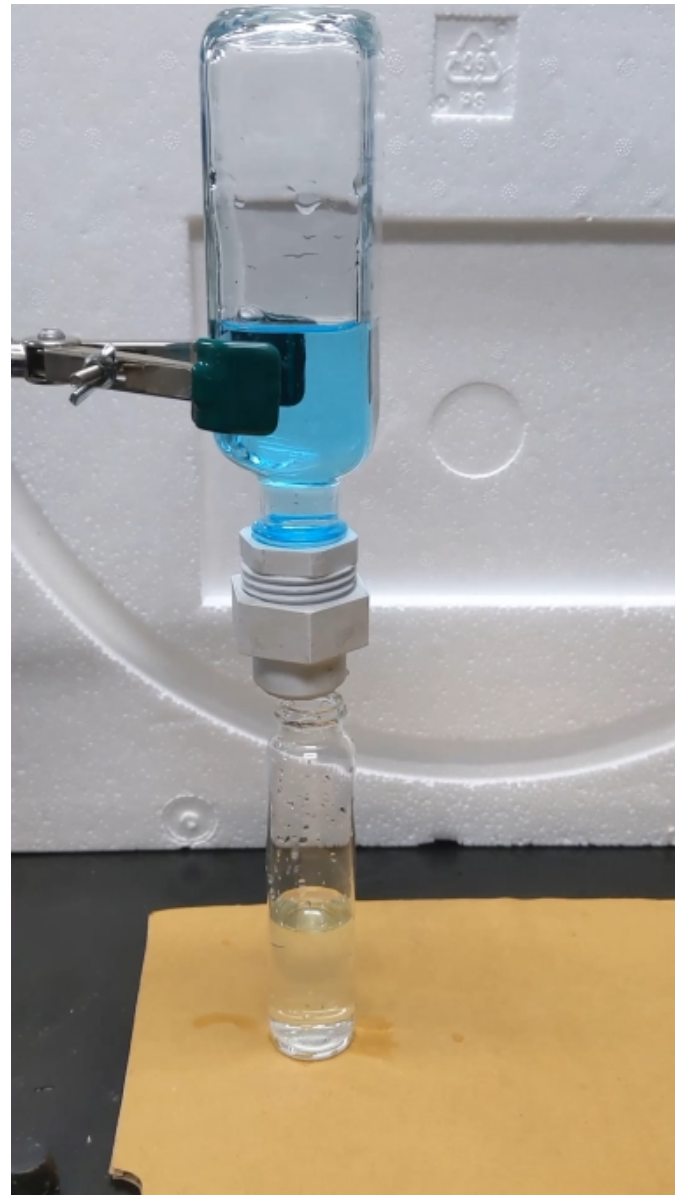

Movie S3. Demonstration of Fixed Bed Adsorption Study
